# Supplementary material
Source: PubMed Central journal article supplement (PMC5679077)
Supplement: NIHMS916359-supplement-SuppMaterials.pdf [file NIHMS916359-supplement-SuppMaterials.pdf]

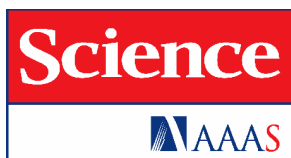

## Supplementary Materials for

### **Bug mapping and fitness testing of chemically synthesized chromosome X**

Yi Wu,\* Bing-Zhi Li,\* Meng Zhao, Leslie A. Mitchell, Ze-Xiong Xie, Qiu-Hui Lin, Xia Wang, Wen-Hai Xiao, Ying Wang, Xiao Zhou, Hong Liu, Xia Li, Ming-Zhu Ding, Duo Liu, Lu Zhang, Bao-Li Liu, Xiao-Le Wu, Fei-Fei Li, Xiu-Tao Dong, Bin Jia, Wen-Zheng Zhang, Guo-Zhen Jiang, Yue Liu, Xue Bai, Tian-Qing Song, Yan Chen, Si-Jie Zhou, Rui-Ying Zhu, Feng Gao, Zheng Kuang, Xuya Wang, Michael Shen, Kun Yang, Giovanni Stracquadanio, Sarah M. Richardson, Yicong Lin, Lihui Wang, Roy Walker, Yisha Luo, Ping-Sheng Ma, Huanming Yang, Yizhi Cai, Junbiao Dai, Joel S. Bader, Jef D. Boeke, Ying-Jin Yuan†

\*These authors contributed equally to this work.

†Corresponding author. E-mail: yjyuan@tju.edu.cn

Published 10 March 2017, *Science* **355**, eaaf4706 (2017)

DOI: 10.1126/science.aaf4706

#### **This PDF file includes:**

Figs. S1 to S10  
Tables S1 to S6

#### **Additional Supplementary Material:**

The following information related to *synX* can be accessed on the [www.syntheticyeast.org](http://www.syntheticyeast.org) website: *synX* design diagram, PCRTag sequences, Feature summary table (wild type X, designed *synX*, physical strain yYW0115; yeast\_chr10\_9\_01), Variants in physical strain (yeast\_chr10\_9\_01), Minichunk plasmids, PCR primers used in this paper.

## Supporting Online Material

### Table of Contents

| Section                                                                                                   | Page |
|-----------------------------------------------------------------------------------------------------------|------|
| Figure S1. Designed map of <i>synX</i> (chromosome version yeast_chr10_3_40).                             | 3    |
| Figure S2. <i>SynX</i> construction.                                                                      | 5    |
| Figure S3. PCRTag analysis of <i>synX</i> .                                                               | 6    |
| Figure S4. Replacement of residual wild type sequence with synthetic counterpart.                         | 9    |
| Figure S5. Plots of read depth for 2-micron in <i>synX</i> .                                              | 10   |
| Figure S6. Transcript profiling of <i>synX</i> strains.                                                   | 11   |
| Figure S7. Growth fitness of <i>synX</i> strains (yYW0077 and yYW0115).                                   | 12   |
| Figure S8. <i>SynX</i> strain cell morphology.                                                            | 13   |
| Figure S9. PoPM can be used in theory to map synthetic defects and multiple defects in synthetic strains. | 15   |
| Figure S10. Large duplications and rearrangements in <i>synX</i> .                                        | 16   |
|                                                                                                           |      |
| Table S1. Deletion of tRNA genes in <i>synX</i> .                                                         | 18   |
| Table S2. Yeast strains used in this study.                                                               | 19   |
| Table S3. <i>SynX</i> version table.                                                                      | 22   |
| Table S4. Sequence variants in the <i>synX</i> chromosome.                                                | 23   |
| Table S5. <i>SynX</i> restriction site “landmarks”.                                                       | 24   |
| Table S6. Replication origins in <i>synX</i> .                                                            | 27   |

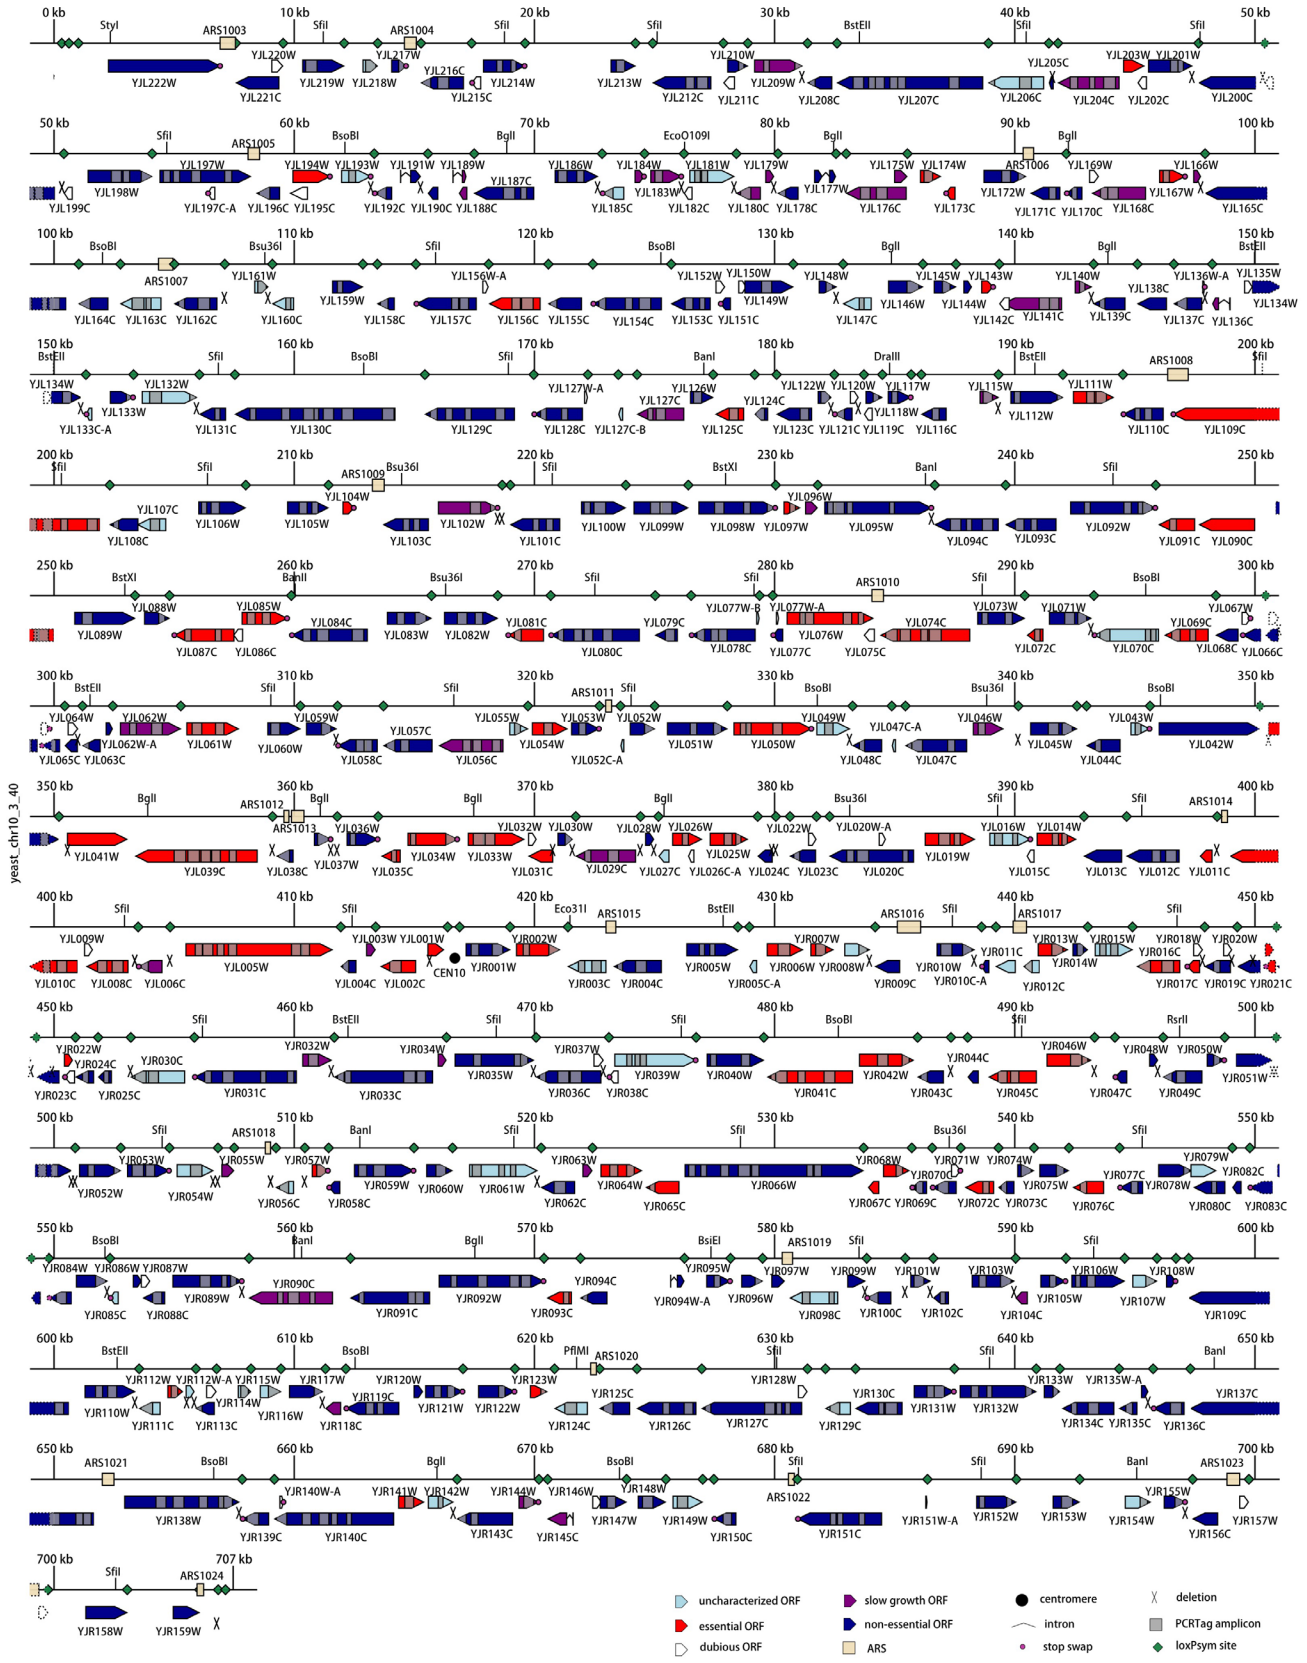

**Fig. S1. Designed map of *synX* (chromosome version yeast\_chr10\_3\_40).** Open reading frames (ORFs) - red, essential; dark blue, non-essential; purple, null mutation confers a slow growth phenotype; light blue, uncharacterized; white, dubious/pseudogene. Autonomously replicating sequences (ARSs) are labeled in pale yellow. Locations marked “x” are present in the native chromosome and deleted in *synX*. Green diamonds represent loxPsym sites embedded in the 3'UTR of non-essential genes and at several other landmarks. Gray bars in ORFs symbolize PCRTag pairs. Fuchsia circles indicate stop codons swap (TAG recoded to TAA). Rare-cutting restriction enzyme sites bordering ~10 kb chunks are also shown. In most cases, the appearance of a deletion symbol in an overlap region with portions of genes was caused by deletion of excess loxPsym sites inserted during the design process. All the versions of *synX* can be accessed from BioStudio (<http://54.160.105.26/gbrowse2/>) with permission.

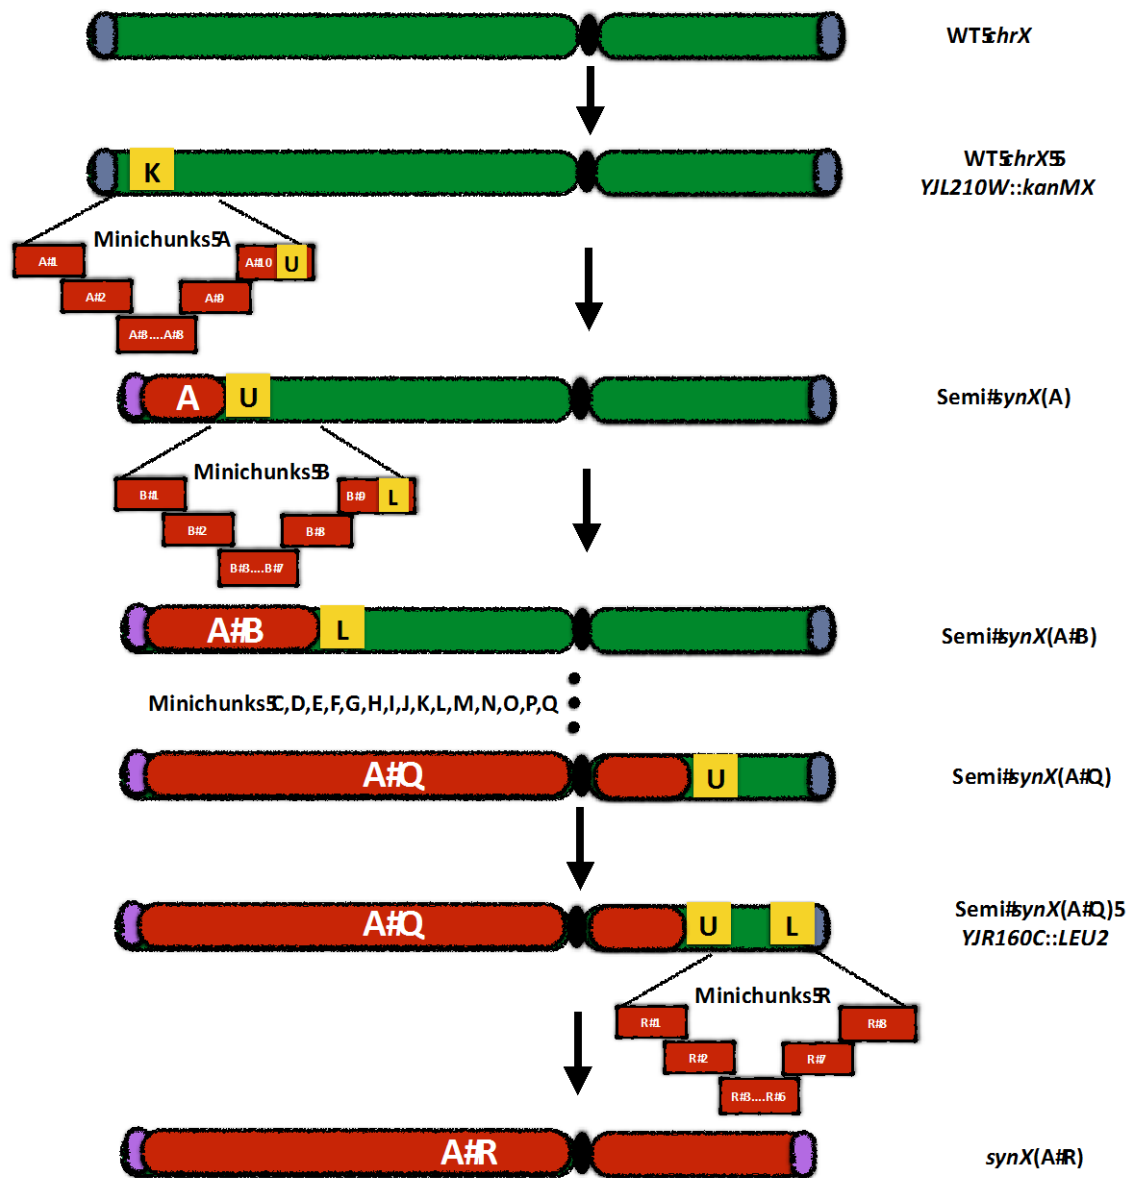

**Fig. S2. *SynX* construction.** Replacement of native yeast chromosome *X* with 5-kb synthetic minichunks. 18 iterative one-step assemblies and replacements of native segments of yeast chromosome *X* were carried out by using pools of overlapping synthetic DNA minichunks (table S1). Genetic markers (*KanMX4*, *LEU2* or *URA3*) were introduced in both boundary of replaced region in every incorporation step, which enabled high-efficiency screen of complete replacement of chromosome *X* in yeast. K, *KanMX4*; U, *URA3*; L, *LEU2*.

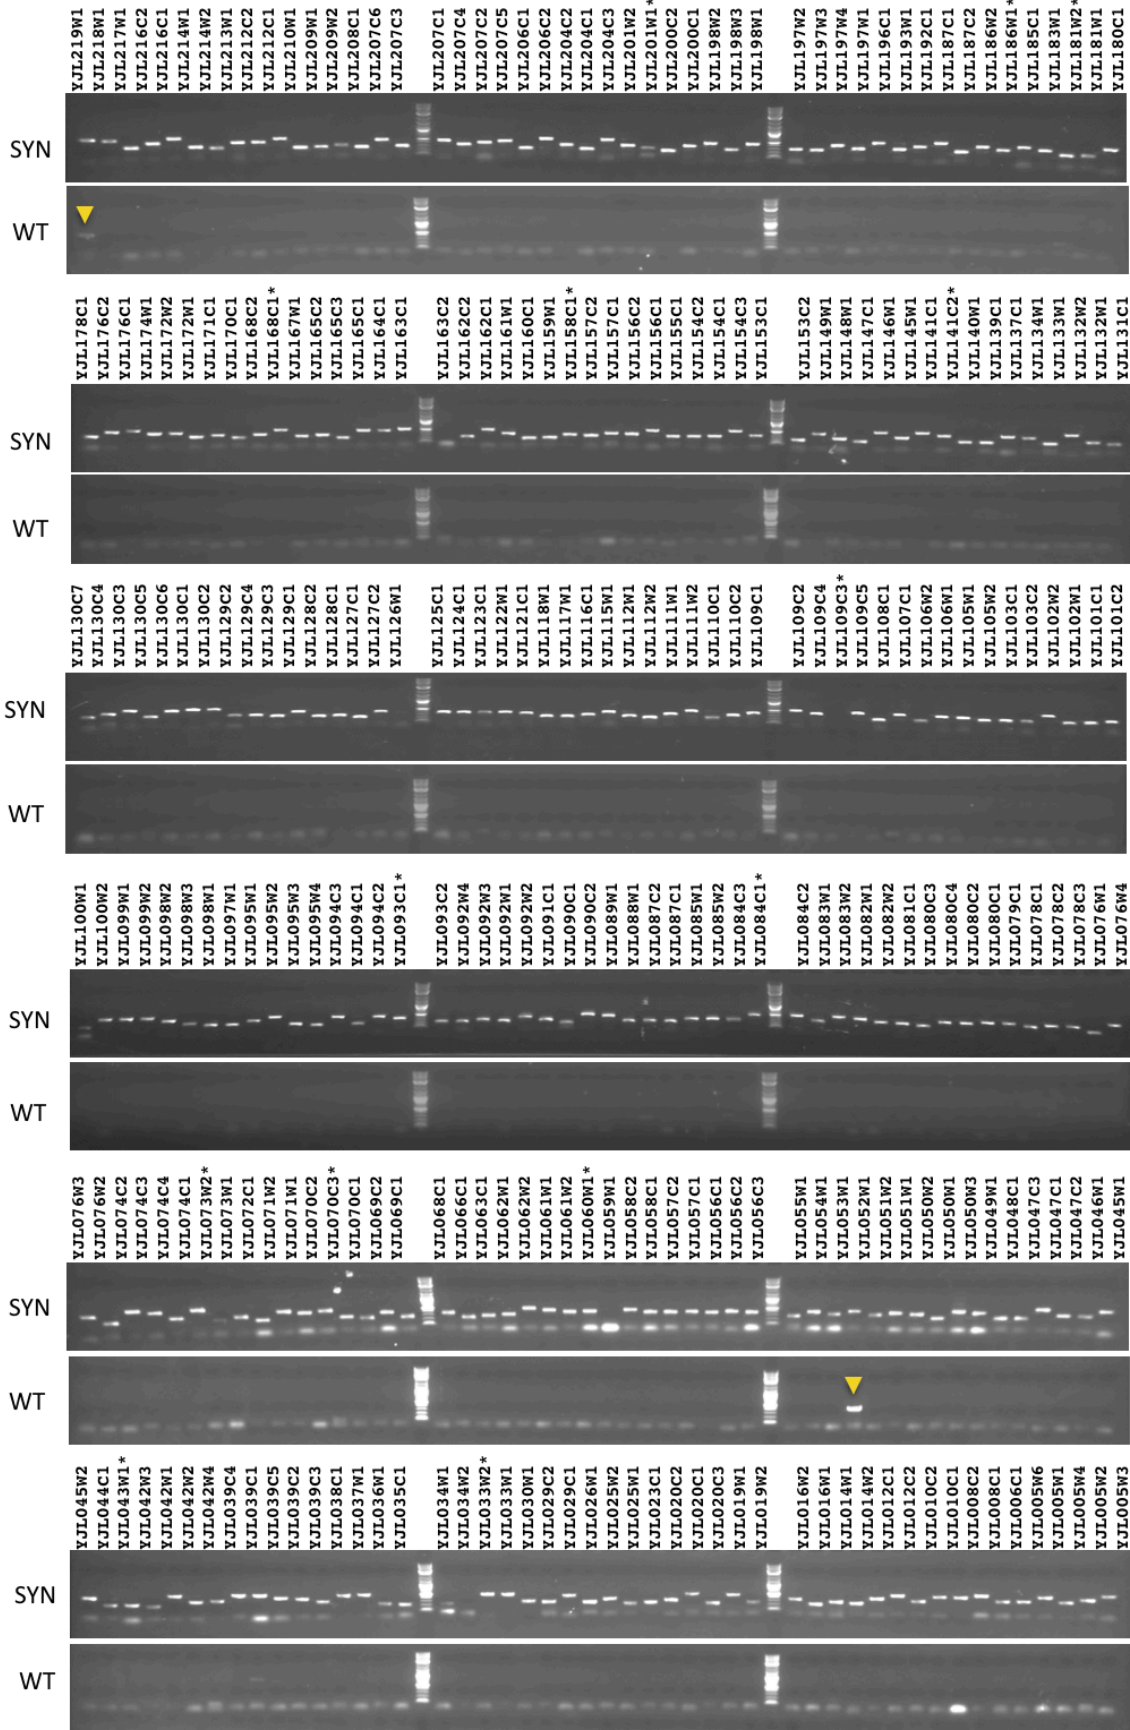



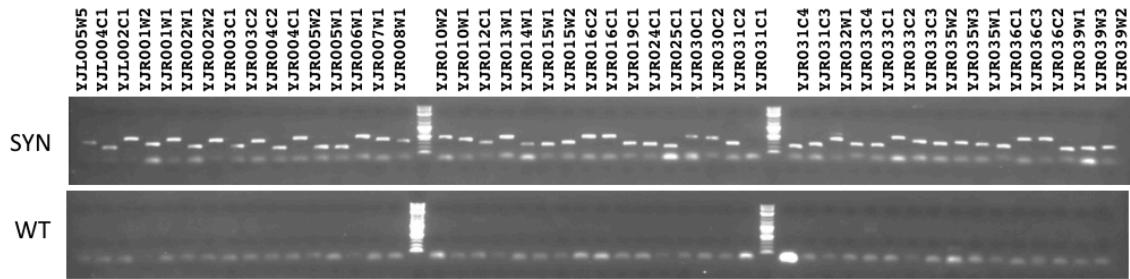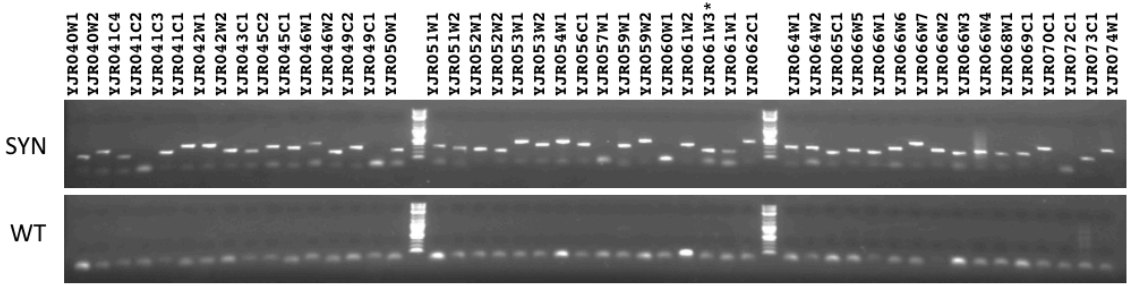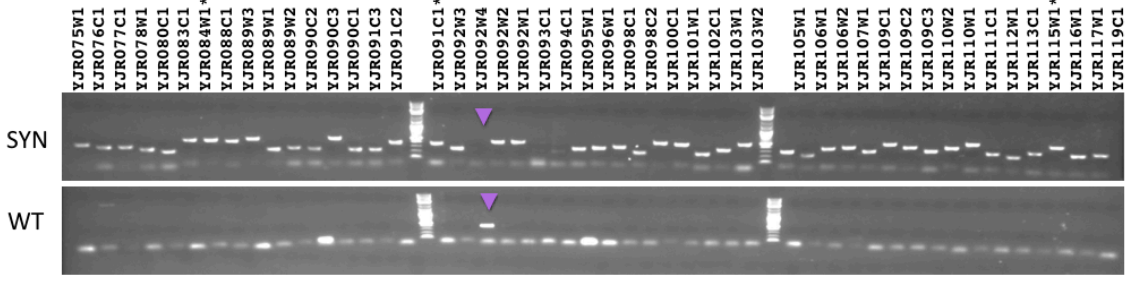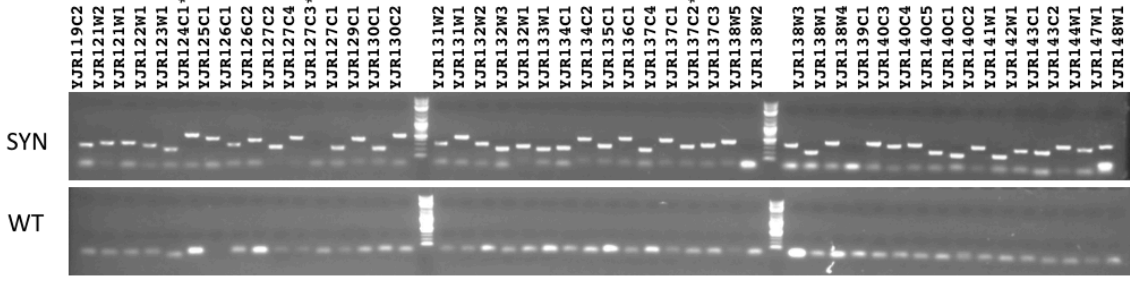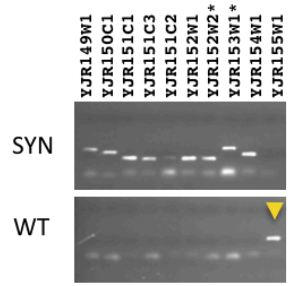

**Fig. S3. PCRTag analysis of *synX*.** The presence of *synX* and absence of native chromosome *X* was verified by amplification of synthetic PCRTags (SYN) compared to wild type PCRTags (WT). PCRTag analysis of *synX* strain (yYW0115) revealed the presence of SYN PCRTags and absence of WT PCRTags. The amplification of WT PCRTags showed in yellow triangle were amplified in homologous region in other chromosomes. YJL219W1 region is homologous with *YOL156W* in chromosome *XV*; YJL052W1 region is homologous with *YGR192C* in chromosome *VII*; YJR155W1 region is homologous with *YFL057C* in chromosome *VI*. PCRTag YJR092W4 region showed in purple triangle was subsequently incorporated by co-transformation with tR(CCU)J-URA3 integration at *HO* (Fig. S4). All the presence of SYN PCRTags that did not yield amplicons under the used PCR conditions were confirmed by whole genome nucleotide sequencing of *synX* strain (yYW0115).



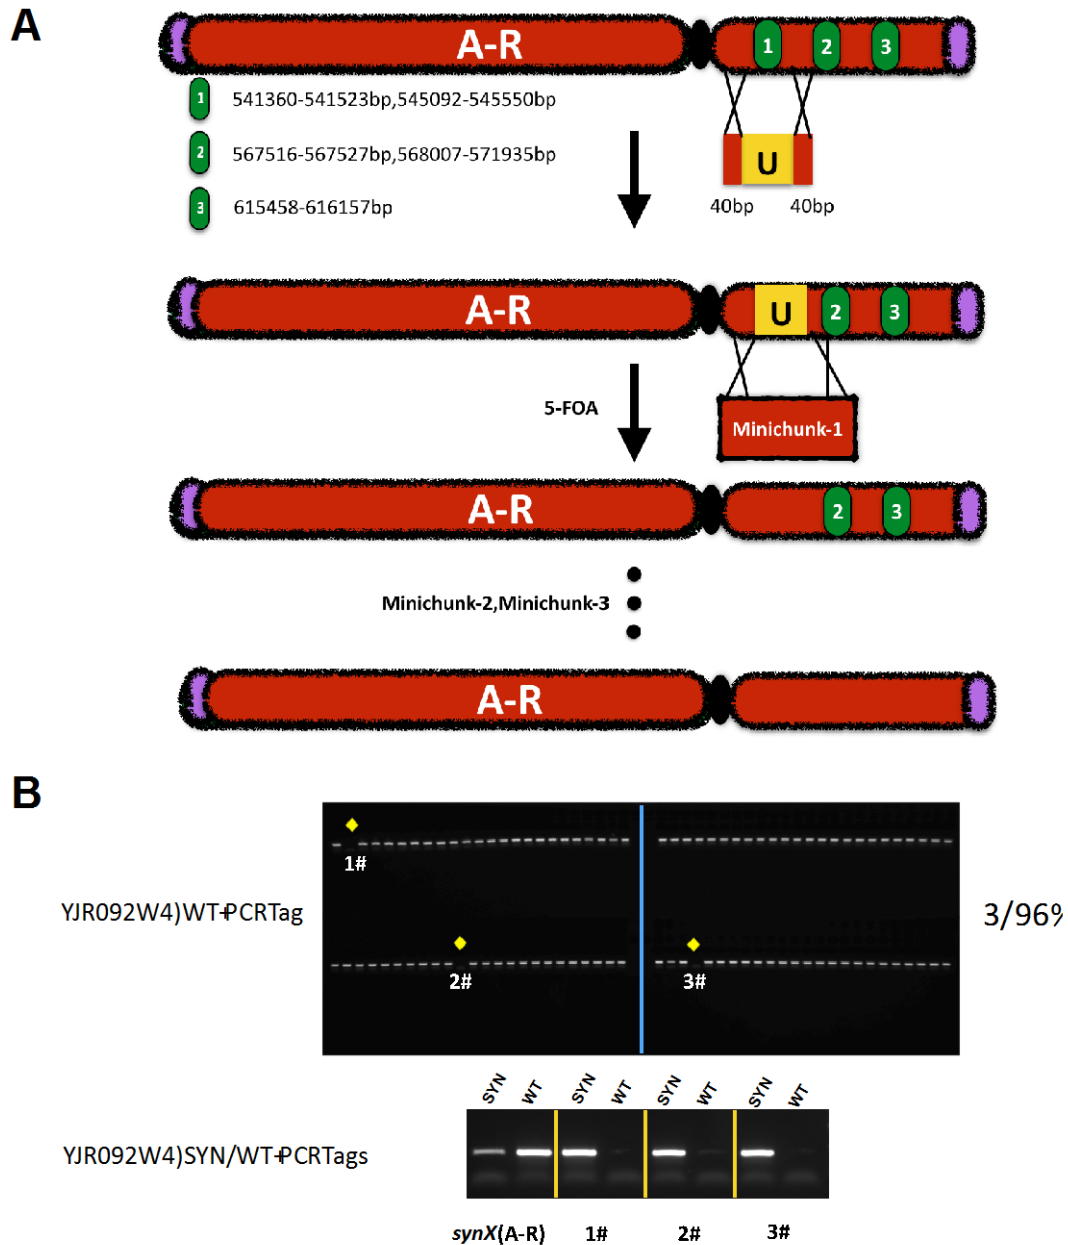

**Fig. S4. Replacement of residual wild type sequence with synthetic counterpart.** (A) Replacement of wild type chromosome regions by two step transformation with synthetic DNA minichunks. Three wild type regions were replaced successively. (B) Incorporation of the synthetic YJR092W4 into *synX* by co-transformation. 3 colonies displayed incorporation of synthetic YJR092W4 after 96 colonies with *URA3* marker were screened. U, *URA3*.

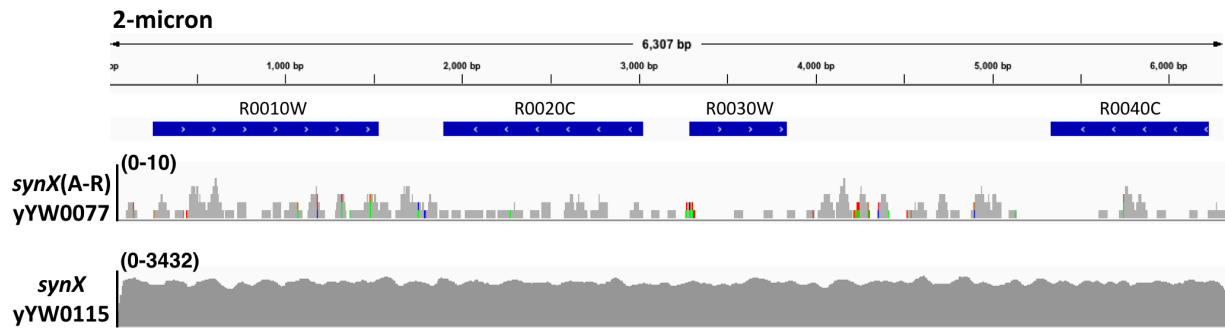

**Fig. S5. Plots of read depth for 2-micron in *synX*.** Read depth analysis of *synX* (yYW0077) reveal absence of native 2-micron plasmid. 2-micron plasmid were recovered in *synX* strain (yYW0115) after a backcross to semi-*synX*(A-F) strain (yYW0098). The copy number of the 2-micron plasmid in yYW0115 is about 30, relative to the average read depth for other chromosomes.

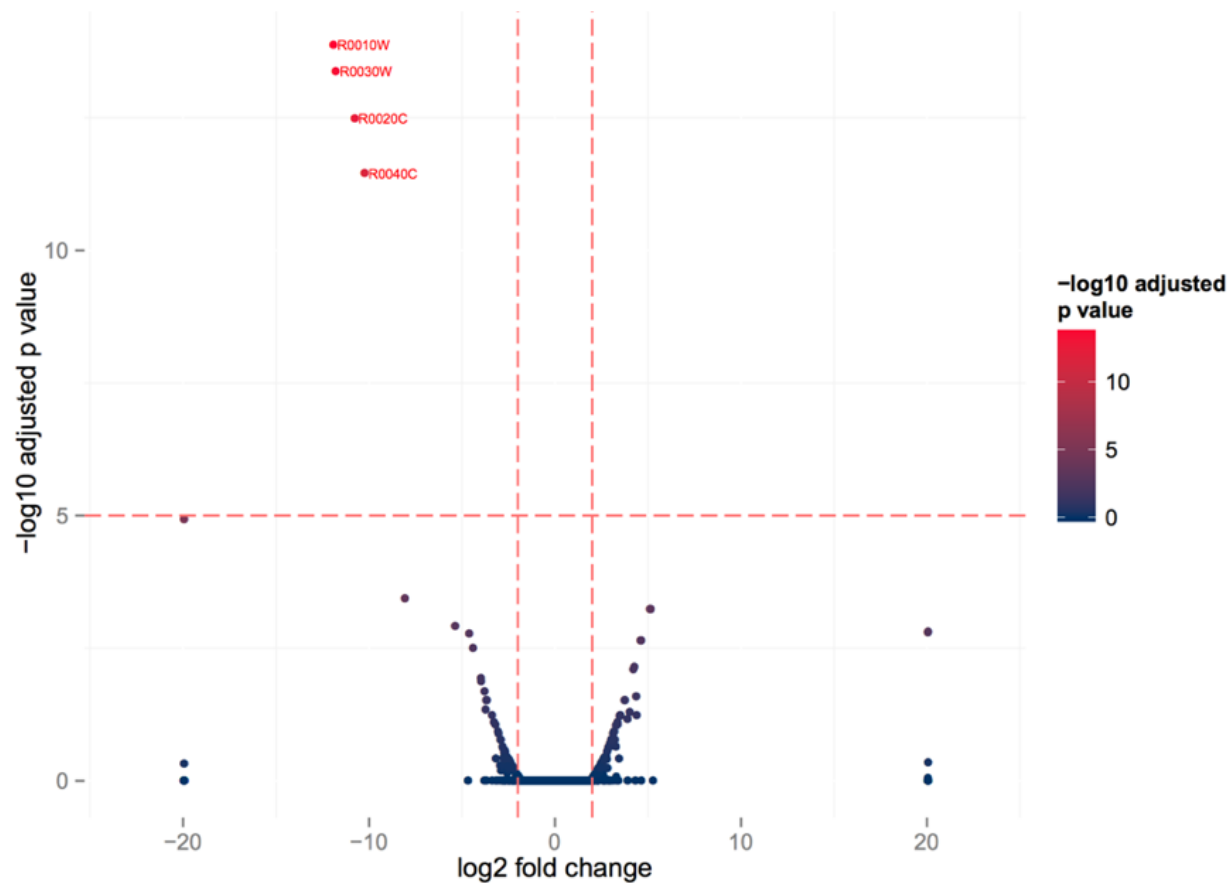

**Fig. S6. Transcript profiling of *synX* strain.** RNA-Seq analysis of *synX* strain (yYW0077) as compared to wild type (BY4741) is shown in a volcano plot. Genes with significantly altered (shown in red) are all in 2-micron native plasmid. Lack of transcripts reflects 2-micron plasmid loss which was verified by whole genome sequencing for yYW0077 (Fig. S5). The dashed line identifies the False Discovery Rate (FDR) threshold at 5 for  $-\log_{10}$  p adjusted value and 2 for absolute value of  $\log_2$ FoldChange.

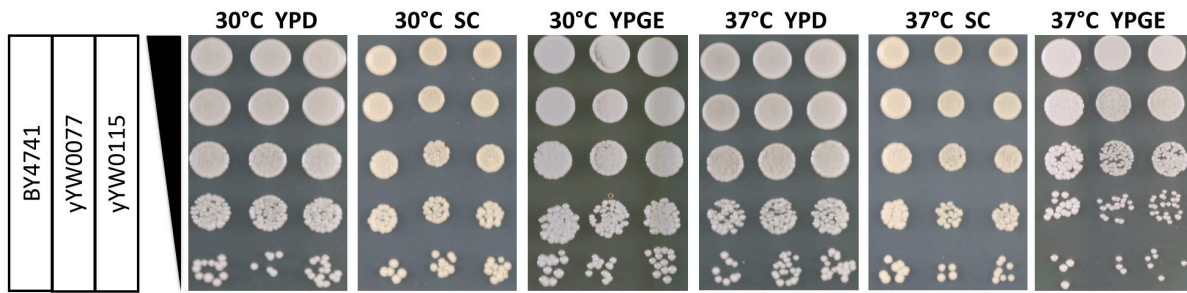

**Fig. S7. Growth fitness of *synX* strains (yYW0077 and yYW0115).** Ten-fold serial dilutions of saturated cultures of wild type (BY4741), yYW0077 and yYW0115 strains were plated on the indicated media and incubated at noted temperatures. YPD, yeast extract peptone dextrose; SC, synthetic complete medium; YPGE, yeast extract peptone glycerol ethanol.

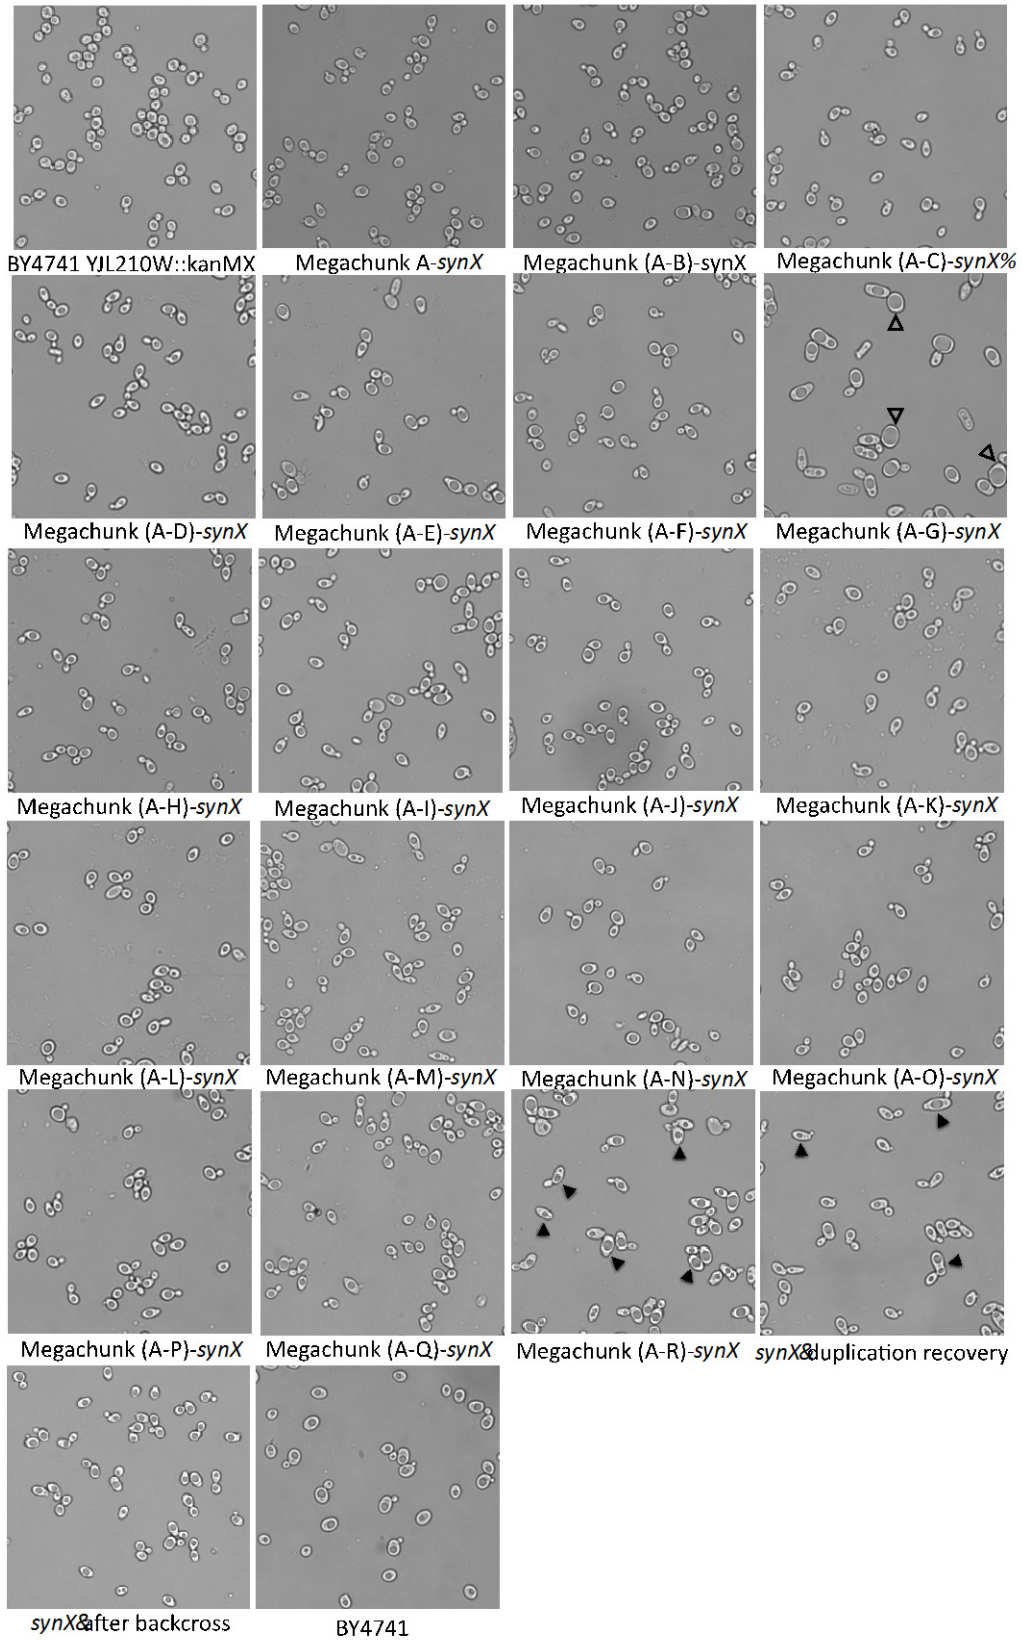

**Fig. S8. *SynX* strain cell morphology.** *SynX* (yYW0115) has an elongated and varied size cell morphology after the megachunk R integration. After backcross to BY4742, the morphology of *synX* almost recovered to wild type although it is still subtly elongated. Abnormal cell morphology in megachunk (A-G)-*synX* was caused by genetic marker *URA3* insert in *YJL080C* which was subsequently reversed upon megachunk H incorporation. Arrowheads indicate cells with morphological defect. Cells were grown to mid-log phase in YPD medium at 30°C. Images were collected using an Olympus CX41 microscope.

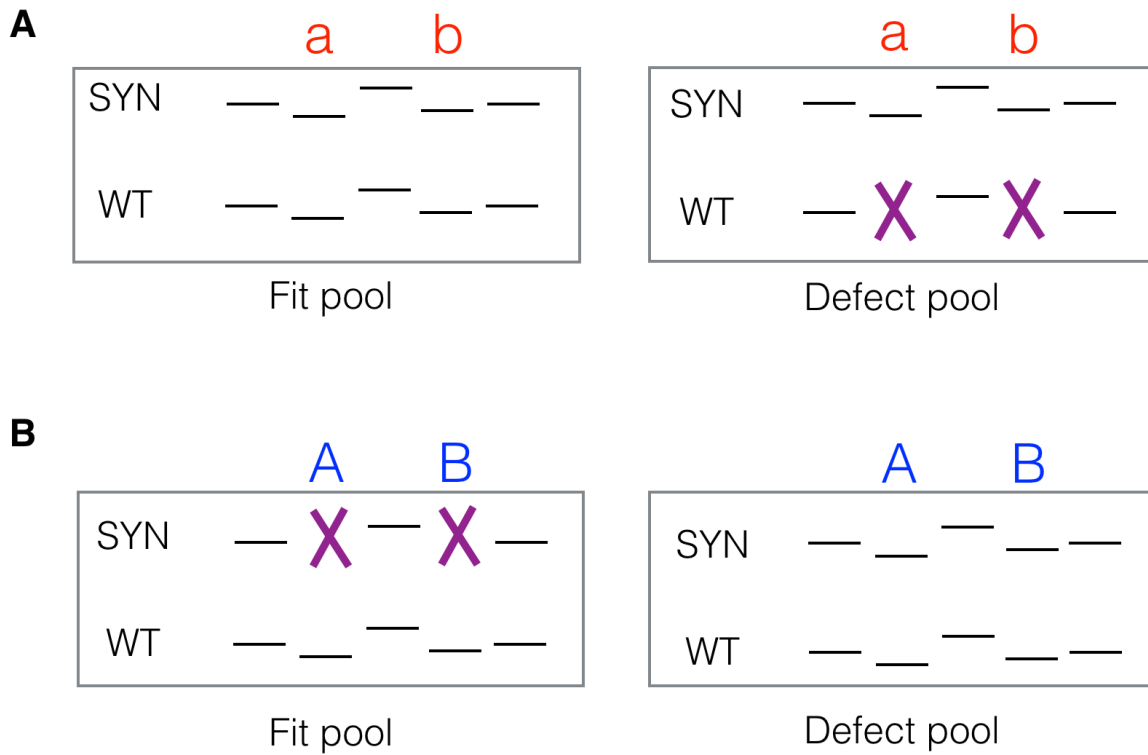

**Fig. S9. PoPM can be used in theory to map synthetic defects and multiple defects in synthetic strains.** (A) Assuming gene “a” and gene “b” are synthetic detrimental interactions, then both SYN and WT PCRTags will be amplified in the fit pool. However, neither of the WT PCRTags will be amplified in the defect pool since the defect will only show up when synthetic gene “a” and synthetic gene “b” both present in a strain. (B) Assuming there are bug “A” and bug “B” showing up at the same time, both SYN and WT PCRTags will show up in the defect pool. However, since either bug “A” or bug “B” can cause a defect, none of the SYN PCRTags of bug “A” or bug “B” will be amplified in the fit pool.



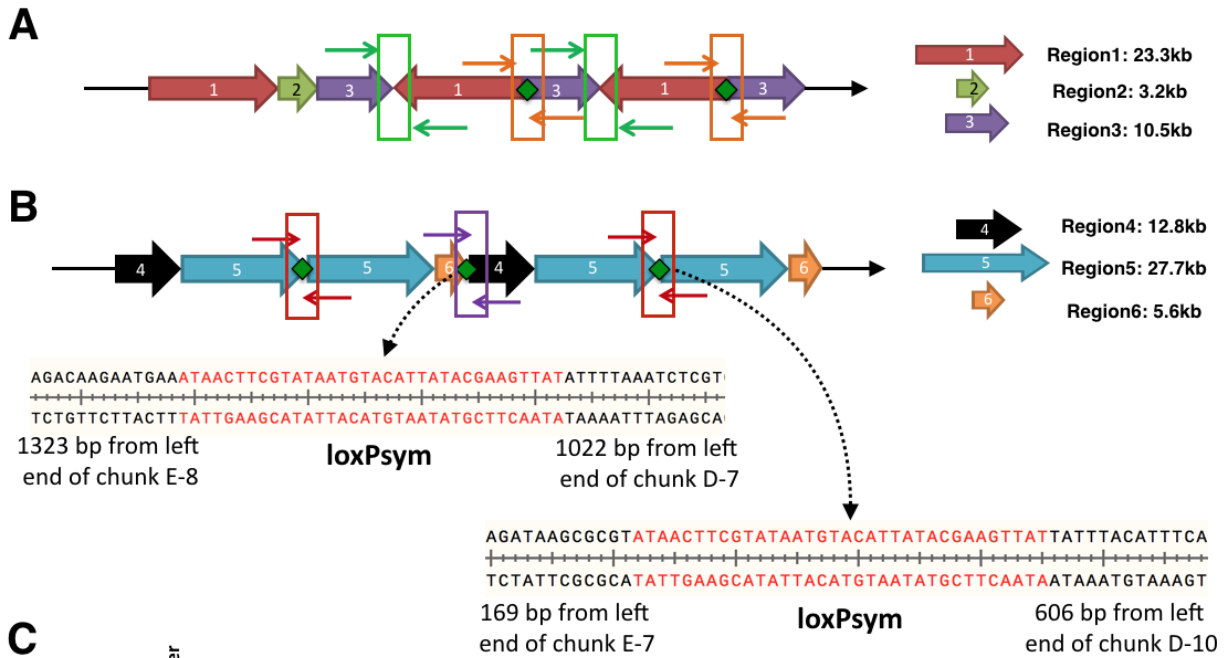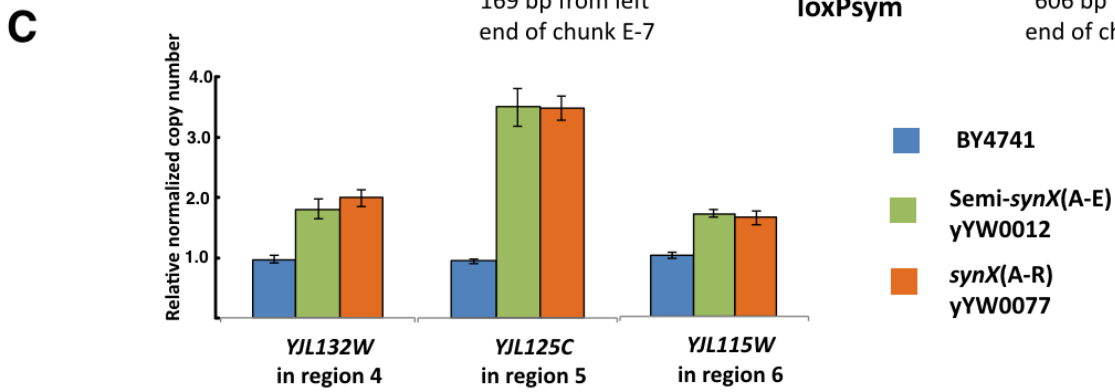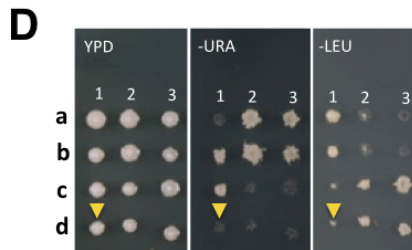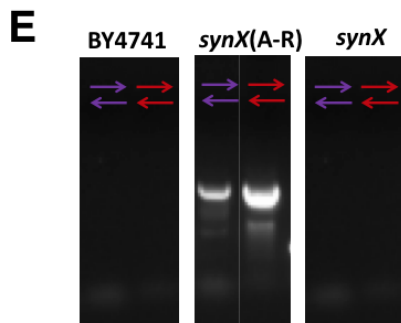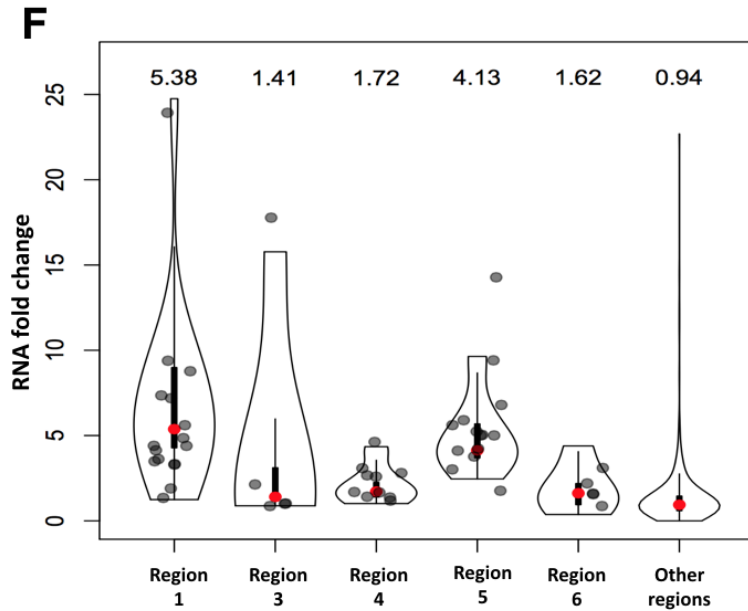

**Fig. S10. Large duplications and rearrangements in *synX*.** (A) Predicted duplication and rearrangement structure in region 1-2-3 in megachunk C (Fig. 4) deduced from sequencing depth and junction sequence analysis. (B) Duplicated fragments in megachunks D and E were joined via loxP sites to form the duplication and rearrangement structure in region 4-5-6. (C) Massive duplications and rearrangements occurred during integrative transformation steps E, not subsequently. Intermediate assembly strain semi-*synX*(A-E) showed the same copy numbers in duplication region 4, 5, 6 compared with final chunk integration strain *synX*(A-R). (D) Phenotype of dissected tetrads from diploid strain (yYW0111). (E) Duplication structure in strain *synX*(A-R) and recovered structure in strain *synX* (yYW0115) were verified by PCR using junction primers. (F) RNASeq analysis of *synX*(A-R) strain as compared to the wild type in duplication regions. RNA fold change in region 4-5-6 was consistent with DNA fragment copy number in each duplication region. In duplication region 1-2-3, the RNA fold change data shows higher transcription level in region 1 and lower transcription level in region 3. The black dots signify individual genes in the duplication region. The red dot shows mean RNA fold change value in the below region, and the value is given on the top.

**Table S1. Deletion of tRNA genes in *synX*.**

| Anticodon                             | AAC  | ACG  | AGA  | AGC  | AGT  | CAT  | CCA  | CCT<br>* | CTT  | GCC  | GTA  | GTC  | TAA  | TAG  | TCT  | TTC  |
|---------------------------------------|------|------|------|------|------|------|------|----------|------|------|------|------|------|------|------|------|
| Isotype                               | Val  | Arg  | Ser  | Ala  | Thr  | Met  | Trp  | Arg      | Lys  | Gly  | Tyr  | Asp  | Leu  | Leu  | Arg  | Glu  |
| Copy number in WT chr10               | 1    | 1    | 1    | 1    | 1    | 3    | 1    | 1        | 1    | 2    | 2    | 4    | 1    | 1    | 2    | 1    |
| Copy number in genome                 | 14   | 6    | 11   | 11   | 11   | 10   | 6    | 1        | 14   | 16   | 8    | 16   | 7    | 3    | 11   | 14   |
| Copy number in <i>synX</i> chromosome | 0    | 0    | 0    | 0    | 0    | 0    | 0    | 0        | 0    | 0    | 0    | 0    | 0    | 0    | 0    | 0    |
| Deletion rate                         | 0.07 | 0.17 | 0.09 | 0.09 | 0.09 | 0.30 | 0.17 | 1.00     | 0.07 | 0.13 | 0.25 | 0.25 | 0.14 | 0.33 | 0.18 | 0.07 |

\*The single copy tRNA gene, *tR(CCU)J* was relocated to the *HO* locus.

**Table S2. Yeast strains used in this study.**

| Strain name | Description                                   | Genotype                                                                                                                                                                      |
|-------------|-----------------------------------------------|-------------------------------------------------------------------------------------------------------------------------------------------------------------------------------|
| BY4741      |                                               | <i>MAT<math>\alpha</math> his3<math>\Delta</math>1 leu2<math>\Delta</math>0 met15<math>\Delta</math>0 ura3<math>\Delta</math>0</i>                                            |
| BY4742      |                                               | <i>MAT<math>\alpha</math> his3<math>\Delta</math>1 leu2<math>\Delta</math>0 lys2<math>\Delta</math>0 ura3<math>\Delta</math>0</i>                                             |
| yYW0001     | Starting strain                               | <i>MAT<math>\alpha</math> his3<math>\Delta</math>1 leu2<math>\Delta</math>0 met15<math>\Delta</math>0 ura3<math>\Delta</math>0 SYN10-YJL210W::kanMX</i>                       |
| yYW0003     | semi-synX A                                   | <i>MAT<math>\alpha</math> his3<math>\Delta</math>1 leu2<math>\Delta</math>0 met15<math>\Delta</math>0 ura3<math>\Delta</math>0 SYN10-41382bp-URA3</i>                         |
| yYW0006     | semi-synX(A-B)                                | <i>MAT<math>\alpha</math> his3<math>\Delta</math>1 leu2<math>\Delta</math>0 met15<math>\Delta</math>0 ura3<math>\Delta</math>0 SYN10-77157bp-LEU2</i>                         |
| yYW0007     | semi-synX (A-C)*                              | <i>MAT<math>\alpha</math> his3<math>\Delta</math>1 leu2<math>\Delta</math>0 met15<math>\Delta</math>0 ura3<math>\Delta</math>0 SYN10-116793bp-URA3</i>                        |
| yYW0010     | semi-synX (A-D)*                              | <i>MAT<math>\alpha</math> his3<math>\Delta</math>1 leu2<math>\Delta</math>0 met15<math>\Delta</math>0 ura3<math>\Delta</math>0 SYN10-157749bp-LEU2</i>                        |
| yYW0012     | semi-synX (A-E)*                              | <i>MAT<math>\alpha</math> his3<math>\Delta</math>1 leu2<math>\Delta</math>0 met15<math>\Delta</math>0 ura3<math>\Delta</math>0 SYN10-191739bp-URA3</i>                        |
| yYW0013     | semi-synX (A-F)*                              | <i>MAT<math>\alpha</math> his3<math>\Delta</math>1 leu2<math>\Delta</math>0 met15<math>\Delta</math>0 ura3<math>\Delta</math>0 SYN10-237184bp-LEU2</i>                        |
| yYW0017     | semi-synX (A-G)*                              | <i>MAT<math>\alpha</math> his3<math>\Delta</math>1 leu2<math>\Delta</math>0 met15<math>\Delta</math>0 ura3<math>\Delta</math>0 SYN10-273426bp-URA3</i>                        |
| yYW0019     | semi-synX (A-H)*                              | <i>MAT<math>\alpha</math> his3<math>\Delta</math>1 leu2<math>\Delta</math>0 met15<math>\Delta</math>0 ura3<math>\Delta</math>0 SYN10-309934bp-LEU2</i>                        |
| yYW0036     | semi-synX (A-I)*                              | <i>MAT<math>\alpha</math> his3<math>\Delta</math>1 leu2<math>\Delta</math>0 met15<math>\Delta</math>0 ura3<math>\Delta</math>0 SYN10-346968bp-URA3</i>                        |
| yYW0037     | semi-synX (A-J)*                              | <i>MAT<math>\alpha</math> his3<math>\Delta</math>1 leu2<math>\Delta</math>0 met15<math>\Delta</math>0 ura3<math>\Delta</math>0 SYN10-390191bp-LEU2</i>                        |
| yYW0039     | semi-synX (A-K)*                              | <i>MAT<math>\alpha</math> his3<math>\Delta</math>1 leu2<math>\Delta</math>0 met15<math>\Delta</math>0 ura3<math>\Delta</math>0 SYN10-428760bp-URA3</i>                        |
| yYW0042     | semi-synX (A-L)*                              | <i>MAT<math>\alpha</math> his3<math>\Delta</math>1 leu2<math>\Delta</math>0 met15<math>\Delta</math>0 ura3<math>\Delta</math>0 SYN10-469319bp-LEU2</i>                        |
| yYW0044     | semi-synX (A-M)*                              | <i>MAT<math>\alpha</math> his3<math>\Delta</math>1 leu2<math>\Delta</math>0 met15<math>\Delta</math>0 ura3<math>\Delta</math>0 SYN10-505408bp-URA3</i>                        |
| yYW0050     | semi-synX (A-N)*                              | <i>MAT<math>\alpha</math> his3<math>\Delta</math>1 leu2<math>\Delta</math>0 met15<math>\Delta</math>0 ura3<math>\Delta</math>0 SYN10-546918bp-LEU2 pRS413(HIS3)- tR(CCU)J</i> |
| yYW0052     | semi-synX (A-O) with wild type minichunk O-6* | <i>MAT<math>\alpha</math> his3<math>\Delta</math>1 leu2<math>\Delta</math>0 met15<math>\Delta</math>0 ura3<math>\Delta</math>0 SYN10-584422bp-URA3 pRS413(HIS3)- tR(CCU)J</i> |
| yYW0055     | semi-synX (A-O)*                              | <i>MAT<math>\alpha</math> his3<math>\Delta</math>1 leu2<math>\Delta</math>0 met15<math>\Delta</math>0 ura3<math>\Delta</math>0 SYN10-584422bp-URA3 pRS413(HIS3)- tR(CCU)J</i> |
| yYW0132     | semi-synX (A-O) with WT YJR093C PCRTag*       | <i>MAT<math>\alpha</math> his3<math>\Delta</math>1 leu2<math>\Delta</math>0 met15<math>\Delta</math>0 ura3<math>\Delta</math>0 SYN10-584422bp-URA3 pRS413(HIS3)- tR(CCU)J</i> |
| yYW0133     | semi-synX (A-O) with WT                       | <i>MAT<math>\alpha</math> his3<math>\Delta</math>1 leu2<math>\Delta</math>0 met15<math>\Delta</math>0 ura3<math>\Delta</math>0 SYN10-</i>                                     |

|         |                                                                                          |                                                                                                                          |
|---------|------------------------------------------------------------------------------------------|--------------------------------------------------------------------------------------------------------------------------|
|         | YJR093C-R PCRTag*                                                                        | 584422bp-URA3 pRS413(HIS3)- tR(CCU)J                                                                                     |
| yYW0062 | semi-synX (A-P) with wild type minichunk O-6*                                            | MAT $\alpha$ his3 $\Delta$ 1 leu2 $\Delta$ 0 met15 $\Delta$ 0 ura3 $\Delta$ 0 SYN10-631028bp-LEU2 pRS413(HIS3)- tR(CCU)J |
| yYW0072 | semi-synX (A-P) with wild type minichunk O-6 and loxPsym inserted after YJR120W removed* | MAT $\alpha$ his3 $\Delta$ 1 leu2 $\Delta$ 0 met15 $\Delta$ 0 ura3 $\Delta$ 0 SYN10-630994bp-LEU2 pRS413(HIS3)- tR(CCU)J |
| yYW0074 | semi-synX (A-Q) with wild type minichunk O-6 and loxPsym inserted after YJR120W removed* | MAT $\alpha$ his3 $\Delta$ 1 leu2 $\Delta$ 0 met15 $\Delta$ 0 ura3 $\Delta$ 0 SYN10-674448bp-URA3 pRS413(HIS3)- tR(CCU)J |
| yYW0077 | synX (A-R) with wild type minichunk O-6 and loxPsym inserted after YJR120W removed*      | MAT $\alpha$ his3 $\Delta$ 1 leu2 $\Delta$ 0 met15 $\Delta$ 0 ura3 $\Delta$ 0 SYN10-707459bp pRS413(HIS3)- tR(CCU)J      |
| yYW0082 | semi-117kb-synX (A-C)                                                                    | MAT $\alpha$ his3 $\Delta$ 1 leu2 $\Delta$ 0 met15 $\Delta$ 0 ura3 $\Delta$ 0 SYN10-116793bp-URA3                        |
| yYW0088 | semi-158kb-synX (A-D)                                                                    | MAT $\alpha$ his3 $\Delta$ 1 leu2 $\Delta$ 0 met15 $\Delta$ 0 ura3 $\Delta$ 0 SYN10-157749bp-LEU2                        |
| yYW0091 | semi-192kb-synX (A-E)                                                                    | MAT $\alpha$ his3 $\Delta$ 1 leu2 $\Delta$ 0 met15 $\Delta$ 0 ura3 $\Delta$ 0 SYN10-191739bp-URA3                        |
| yYW0094 | semi-237kb-synX (A-F)                                                                    | MAT $\alpha$ his3 $\Delta$ 1 leu2 $\Delta$ 0 met15 $\Delta$ 0 ura3 $\Delta$ 0 SYN10-237184bp-LEU2                        |
| yYW0098 | semi-237kb-synX (A-F) mating type changed                                                | MAT $\alpha$ his3 $\Delta$ 1 leu2 $\Delta$ 0 met15 $\Delta$ 0 ura3 $\Delta$ 0 SYN10-237184bp-LEU2                        |
| yYW0100 | yYW0077 615458-616157bp region replaced by SYN fragment*                                 | MAT $\alpha$ his3 $\Delta$ 1 leu2 $\Delta$ 0 met15 $\Delta$ 0 ura3 $\Delta$ 0 SYN10                                      |
| yYW0101 | yYW0100 567516-567527bp, 568007-571935bp region replaced by SYN fragment*                | MAT $\alpha$ his3 $\Delta$ 1 leu2 $\Delta$ 0 met15 $\Delta$ 0 ura3 $\Delta$ 0 SYN10                                      |
| yYW0103 | yYW0101 541360-541523bp, 545092-545550bp region replaced by SYN fragment*                | MAT $\alpha$ his3 $\Delta$ 1 leu2 $\Delta$ 0 met15 $\Delta$ 0 ura3 $\Delta$ 0 SYN10                                      |
| yYW0111 | Diploid yYW0098 X yYW0103                                                                | MAT $\alpha$ / $\alpha$ his3 $\Delta$ 1 leu2 $\Delta$ 0 met15 $\Delta$ 0 ura3 $\Delta$ 0 SYN10                           |
| yYW0113 | synX spore dissected from yYW0111                                                        | MAT $\alpha$ his3 $\Delta$ 1 leu2 $\Delta$ 0 met15 $\Delta$ 0 ura3 $\Delta$ 0 SYN10                                      |
| yYW0115 | synX with wild type tR(CCU)J integrated at HO locus                                      | MAT $\alpha$ his3 $\Delta$ 1 leu2 $\Delta$ 0 met15 $\Delta$ 0 ura3 $\Delta$ 0 SYN10 HO::tR(CCU)J-URA3                    |
| yYW0117 | yYW0115 with URA3 knock out                                                              | MAT $\alpha$ his3 $\Delta$ 1 leu2 $\Delta$ 0 met15 $\Delta$ 0 ura3 $\Delta$ 0 SYN10 HO::tR(CCU)J                         |
| yYW0134 | BY4741 with GFP integrated at                                                            | MAT $\alpha$ leu2 $\Delta$ 0 met15 $\Delta$ 0 ura3 $\Delta$ 0 his3 $\Delta$ 1::NAT-                                      |

|         | <i>HIS3</i> locus                                     | <i>GFP</i>                                                                                                                                                              |
|---------|-------------------------------------------------------|-------------------------------------------------------------------------------------------------------------------------------------------------------------------------|
| yYW0153 | yYW0115 with RFP integrated at <i>HIS3</i> locus      | <i>MAT<math>\alpha</math> leu2<math>\Delta</math>0 met15<math>\Delta</math>0 ura3<math>\Delta</math>0 SYN10 HO::tR(CCU)J-URA3 his3<math>\Delta</math>1::NAT-dTomato</i> |
| yYW0138 | BY4742 with Gal-CEN10-URA integrated at CEN10         | <i>MAT<math>\alpha</math> his3<math>\Delta</math>1 leu2<math>\Delta</math>0 lys2<math>\Delta</math>0 ura3<math>\Delta</math>0 CEN10::pGal1-CEN10-URA3</i>               |
| yYW0155 | Diploid yYW0117 X yYW0138                             | <i>MAT<math>\alpha</math>/<math>\alpha</math> his3<math>\Delta</math>1 leu2<math>\Delta</math>0 ura3<math>\Delta</math>0 WT CEN10::pGal1-CEN10-URA3 SYN10</i>           |
| yYW0156 | Diploid yYW0155 WT chr10 lost                         | <i>MAT<math>\alpha</math>/<math>\alpha</math> his3<math>\Delta</math>1 leu2<math>\Delta</math>0 ura3<math>\Delta</math>0 SYN10</i>                                      |
| yYW0159 | <i>synX</i> spore dissected from yYW0156              | <i>MAT<math>\alpha</math> his3<math>\Delta</math>1 leu2<math>\Delta</math>0 met15<math>\Delta</math>0 ura3<math>\Delta</math>0 SYN10 HO::tR(CCU)J-URA3</i>              |
| yYW0120 | BY4741 FIP1-SYN-YJR093C-R                             | <i>MAT<math>\alpha</math> his3<math>\Delta</math>1 leu2<math>\Delta</math>0 met15<math>\Delta</math>0 ura3<math>\Delta</math>0 FIP1-SYN-YJR093C-R</i>                   |
| yYW0122 | BY4741 FIP1-SYN-YJR093C-R 1-Asp codon replaced by WT  | <i>MAT<math>\alpha</math> his3<math>\Delta</math>1 leu2<math>\Delta</math>0 met15<math>\Delta</math>0 ura3<math>\Delta</math>0 FIP1-SYN-YJR093C-R SYN-WT codon 1</i>    |
| yYW0123 | BY4741 FIP1-SYN-YJR093C-R 2-Ala codon replaced by WT  | <i>MAT<math>\alpha</math> his3<math>\Delta</math>1 leu2<math>\Delta</math>0 met15<math>\Delta</math>0 ura3<math>\Delta</math>0 FIP1-SYN-YJR093C-R SYN-WT codon 2</i>    |
| yYW0124 | BY4741 FIP1-SYN-YJR093C-R 3-Gly codon replaced by WT  | <i>MAT<math>\alpha</math> his3<math>\Delta</math>1 leu2<math>\Delta</math>0 met15<math>\Delta</math>0 ura3<math>\Delta</math>0 FIP1-SYN-YJR093C-R SYN-WT codon 3</i>    |
| yYW0125 | BY4741 FIP1-SYN-YJR093C-R 4-Ala codon replaced by WT  | <i>MAT<math>\alpha</math> his3<math>\Delta</math>1 leu2<math>\Delta</math>0 met15<math>\Delta</math>0 ura3<math>\Delta</math>0 FIP1-SYN-YJR093C-R SYN-WT codon 4</i>    |
| yYW0126 | BY4741 FIP1-SYN-YJR093C-R 5-Ser codon replaced by WT  | <i>MAT<math>\alpha</math> his3<math>\Delta</math>1 leu2<math>\Delta</math>0 met15<math>\Delta</math>0 ura3<math>\Delta</math>0 FIP1-SYN-YJR093C-R SYN-WT codon 5</i>    |
| yYW0127 | BY4741 FIP1-SYN-YJR093C-R 6-Ser codon replaced by WT  | <i>MAT<math>\alpha</math> his3<math>\Delta</math>1 leu2<math>\Delta</math>0 met15<math>\Delta</math>0 ura3<math>\Delta</math>0 FIP1-SYN-YJR093C-R SYN-WT codon 6</i>    |
| yYW0128 | BY4741 FIP1-SYN-YJR093C-R 7-Asn codon replaced by WT  | <i>MAT<math>\alpha</math> his3<math>\Delta</math>1 leu2<math>\Delta</math>0 met15<math>\Delta</math>0 ura3<math>\Delta</math>0 FIP1-SYN-YJR093C-R SYN-WT codon 7</i>    |
| yYW0129 | BY4741 FIP1-SYN-YJR093C-R 8-Pro codon replaced by WT  | <i>MAT<math>\alpha</math> his3<math>\Delta</math>1 leu2<math>\Delta</math>0 met15<math>\Delta</math>0 ura3<math>\Delta</math>0 FIP1-SYN-YJR093C-R SYN-WT codon 8</i>    |
| yYW0130 | BY4741 FIP1-SYN-YJR093C-R 9-Asp codon replaced by WT  | <i>MAT<math>\alpha</math> his3<math>\Delta</math>1 leu2<math>\Delta</math>0 met15<math>\Delta</math>0 ura3<math>\Delta</math>0 FIP1-SYN-YJR093C-R SYN-WT codon 9</i>    |
| yYW0131 | BY4741 FIP1-SYN-YJR093C-R 10-Ile codon replaced by WT | <i>MAT<math>\alpha</math> his3<math>\Delta</math>1 leu2<math>\Delta</math>0 met15<math>\Delta</math>0 ura3<math>\Delta</math>0 FIP1-SYN-YJR093C-R SYN-WT codon 10</i>   |

\* Strains with massive duplications and rearrangements.

**Table S3. *SynX* version table.**

| Version name         | Strain number | Comment                                                                                                                       | Details                                                                                                                                                                                                                                                                                                                                |
|----------------------|---------------|-------------------------------------------------------------------------------------------------------------------------------|----------------------------------------------------------------------------------------------------------------------------------------------------------------------------------------------------------------------------------------------------------------------------------------------------------------------------------------|
| yeast_chr<br>10_3_37 | NA            | Designed version in biostudio                                                                                                 |                                                                                                                                                                                                                                                                                                                                        |
| yeast_chr<br>10_3_38 | NA            | Restore <i>YJR079W</i> intron ( <i>YJR079W</i> has overlap region with <i>YJR080C</i> )                                       | 705bp <i>YJR079W</i> intron restored; evidence the <i>YJR079W</i> is a real gene is very limited.                                                                                                                                                                                                                                      |
| yeast_chr<br>10_3_39 | NA            | Restore PCRTag <i>YJR093C1</i> -Revert to wild type sequence (synthetic <i>YJR093C1</i> -Revert sequence causing grow defect) | 571414-571441,<br>"GATGTCTGGGTTTGAAGTACGCGCCAGCA"<br>replaced by<br>"TATATCAGGATTACTGGACGCACCTGCG"                                                                                                                                                                                                                                     |
| yeast_chr<br>10_3_40 | NA            | Remove loxPsym site after <i>YJR120W</i> (dubious ORF; may disrupt promoter of <i>ATP2</i> which is an important gene)        | 34bp loxPsym site<br>"ATAACTTCGTATAATGTACATTATACGAAGTTAT"<br>inserted after <i>YJR120W</i> was removed                                                                                                                                                                                                                                 |
| yeast_chr<br>10_3_41 | NA            | GFF annotations updated ; sequence unchanged from prior version                                                               |                                                                                                                                                                                                                                                                                                                                        |
| yeast_chr<br>10_9_01 | yYW0115       | Genome sequenced, 11 variant nucleotides arose and 2 loxPsym sites were absent                                                | Mutations at 204034 "T" to "C", 225233 "C" to "T", 227311 "T" to "C", 272048 "A" to "G", 311658 "C" to "A", 387191 "T" to "C", 408449 "T" to "C", 511671 "C" to "T", 564352 "C" to "G", 580754 "G" to "T", 705687 "G" to "A"; Two loxPsym sites at position of 392866( <i>YJL013C</i> ) and 507487( <i>YJR055W</i> ) were also absent. |



**Table S4. Sequence variants in the *synX* chromosome.**

| Position in yeast_chr10_3_40 | Reference yeast_chr10_3_40 | Variant <i>synX</i> yeast_chr10_9_01 | ORF     | Amino acid Substitution |
|------------------------------|----------------------------|--------------------------------------|---------|-------------------------|
| 204034                       | T                          | C                                    | YJL107C | Asp-Gly(207)            |
| 225233                       | C                          | T                                    | YJL099W | Synonymous              |
| 227311                       | T                          | C                                    | YJL098W | Synonymous              |
| 272048                       | A                          | G                                    | YJL080C | Leu-Pro (774)           |
| 311658                       | C                          | A                                    | YJL059W | Ala-Asp (382)           |
| 387191                       | T                          | C                                    | YJL019W | Ser-Pro (307)           |
| 408449                       | T                          | C                                    | YJL005W | Tyr-His (986)           |
| 511671                       | C                          | T                                    | YJR058C | Asp-Asn (77)            |
| 564352                       | C                          | G                                    | YJR091C | Met-Ile (429)           |
| 580754                       | G                          | T                                    | YJR098C | Ser-Arg (625)           |
| 705687                       | G                          | A                                    | YJR159W | Gly-Ser(242)            |

Two loxPsym sites at position of 392866(*YJL013C*) and 507487(*YJR055W*) were also absent.

**Table S5. *SynX* restriction site “landmarks”.**

| Restriction Enzyme | Synthetic coordinates |           | WT Sequence     | New Sequence    | Pre-existing/Introduced (P/I) |
|--------------------|-----------------------|-----------|-----------------|-----------------|-------------------------------|
|                    | Start (bp)            | Stop (bp) |                 |                 |                               |
| Styl               | 2341                  | 2349      | CCCAAGGTT       | CCCAAGGTT       | P                             |
| Sfil               | 11202                 | 11216     | CCGCCCTTTTGCC   | CCAGCCTTGTAGCA  | I                             |
| Sfil               | 18746                 | 18760     | CCGCCGTAGTGCC   | CCTGCTGTGGTTGCA | I                             |
| Sfil               | 25103                 | 25117     | GGCCACTCCGGCCTC | TGCCACACCTGCTTC | I                             |
| BstEII             | 33528                 | 33536     | TGGTAACCT       | TGGCAACCT       | I                             |
| Sfil               | 40468                 | 40482     | GGCCCCACGGCCAG  | GGCTCCGACTGCTAA | I                             |
| Sfil               | 47706                 | 47720     | GGCCGAACCGGCCTT | TGCTGAACCAGCTTT | I                             |
| Sfil               | 54687                 | 54701     | GGCCAGGATGGCCGA | GGTCAAGATGGAAGA | I                             |
| BsoBI              | 62110                 | 62115     | CTCGGG          | TTGGGT          | I                             |
| BglI               | 68843                 | 68857     | TCGCTAGTTGGCGT  | TCGTCTTGTGGAGT  | I                             |
| EcoO109I           | 76251                 | 76257     | GGTCCCA         | GGTCCCA         | P                             |
| BglI               | 82455                 | 82466     | GCCAAGGCGGCT    | GCCAAGGCTGCT    | I                             |
| BglI               | 92227                 | 92238     | GCCAAAAGGCT     | GCCAAGCAAAGA    | I                             |
| BsoBI              | 102014                | 102022    | AACTCGGGC       | AACTCTCGC       | I                             |
| Bsu36I             | 108774                | 108782    | ACCTTAGGC       | ACCTTAGGC       | P                             |
| Sfil               | 115879                | 115893    | GGCCCCAGGGCCCC  | CGCTCCTAAAGCGCC | I                             |
| BsoBI              | 125265                | 125270    | CTCGGG          | TTCTGG          | I                             |
| BglI               | 134861                | 134872    | AGCCCGATAGGC    | TCTCCCATAGGT    | I                             |
| BglI               | 143874                | 143885    | GCCCTTAAGGCG    | GCCCTCAATCT     | I                             |
| BstEII             | 149977                | 149985    | GGTAACCAT       | GGTAATCAT       | I                             |
| Sfil               | 156835                | 156849    | GGCCTCCTTGCCCT  | TGCCTCTTAGCTCG  | I                             |
| BsoBI              | 162892                | 162900    | TCTCGGGTG       | TCTAGGGTG       | I                             |
| Sfil               | 168909                | 168923    | GGCCCCGCGGCCAG  | TGCGCCGCTGCTAA  | I                             |
| BanI               | 177052                | 177057    | GGTGCC          | GGGGCT          | I                             |
| DralI              | 184785                | 184796    | GCACCCAGTGTC    | GCCCCATCGGTC    | I                             |
| BstEII             | 190833                | 190841    | GGGGTAACC       | GGTGTCACC       | I                             |
| Sfil               | 200299                | 200313    | GGCCGTGGGGGCCGC | AGCAGTAGGGGCAGC | I                             |
| Sfil               | 206381                | 206395    | CTGGCCATCCCGGCC | CTGGCAATCCCAGCG | I                             |
| Bsu36I             | 214468                | 214476    | GTCCTGAGG       | GTCTTGAGG       | I                             |
| Sfil               | 220736                | 220750    | GGCCGGCGTGGCCTC | AGCTGGTGTGCTC   | I                             |
| BstXI              | 227954                | 227968    | ACCAGACAGCTGGTT | ACAAGGCAATTAGTT | I                             |
| BanI               | 236279                | 236287    | TCGGCACCA       | TCGGCACCA       | P                             |
| Sfil               | 244082                | 244096    | GAGGCCATAAAGGCC | GAAGCCATTAAAGCA | I                             |

|        |        |        |                 |                 |   |
|--------|--------|--------|-----------------|-----------------|---|
| BstXI  | 252943 | 252957 | TCCAATTCCTGGAT  | TCCAATTCCTAGAT  |   |
| BanII  | 260037 | 260045 | TGAGCCCTG       | TGAGCCCTG       | P |
| Bsu36I | 266301 | 266309 | TCCTCAGGT       | TCTTCTGGT       |   |
| Sfil   | 272512 | 272526 | GGCCTTAGCGGCCTT | AGCTTTGGCAGCTTT |   |
| Sfil   | 279138 | 279152 | GGCCTTCACGGCCAC | TGCCTTGACGGCTAC |   |
| Sfil   | 288639 | 288653 | ACGGCCGACCCGGCC | ACCGTGACCCTGCT  |   |
| BsoBI  | 295450 | 295458 | GCTCGGGTC       | GCTTGGGTC       |   |
| BstEII | 301495 | 301503 | CAGGTTACC       | TAAATTGCC       |   |
| Sfil   | 309022 | 309036 | GCGGCCGCCAAGGCC | GCTGCCGCTAAGGCC |   |
| Sfil   | 316640 | 316654 | GGCCCCGTCGGCCTT | TGCTCCATCTGCTTT |   |
| Sfil   | 324018 | 324032 | GGCCGGATCGGCCGA | GGTAGAATCGGTAGA |   |
| BsoBI  | 331776 | 331781 | CCCAGAG         | CCAGAA          |   |
| Bsu36I | 338828 | 338836 | CTCCTTAGG       | CTACTTAGA       |   |
| BsoBI  | 346063 | 346071 | CGCCCCGAGT      | AGGCCCAGT       |   |
| BglI   | 353898 | 353909 | GGCCTTGAAGGC    | GGCTTTAAAAGC    |   |
| BglI   | 361082 | 361093 | GGCCTTAATGGC    | GGTTTAAATGGT    |   |
| BglI   | 367471 | 367482 | AGCCTGCAAGGC    | AGTTTACAAGGC    |   |
| BglI   | 375394 | 375405 | GCCACAAAGGCC    | GCCACAGAGACC    |   |
| Bsu36I | 383126 | 383134 | CACCTTAGG       | CACCTTCGG       |   |
| Sfil   | 389279 | 389293 | GTGGCCGATGTGGCC | GTCGCAGACGTGGCC |   |
| Sfil   | 395281 | 395295 | GGCCACTAAGGCCGC | AGCAACCAAAGCAGC |   |
| Sfil   | 402928 | 402942 | TCGGCCACAAGGGCC | TCTACCACAGGGTCC |   |
| Sfil   | 412404 | 412418 | GGCCAACTTGGCCCA | CGCTAGCTTCGCCCA |   |
| Eco31I | 421476 | 421487 | GGTCTCTAACGC    | TGTTTCTAACGC    |   |
| BstEII | 427854 | 427862 | AGGTCACCT       | AGAAGTCCT       |   |
| Sfil   | 437396 | 437410 | GCGGCCCGCGAGGCC | GCCGCCAGAGAAGCT |   |
| Sfil   | 446749 | 446763 | GGCCTGGCTGGCCCC | GGCCTGGGACGCACC |   |
| Sfil   | 456172 | 456186 | GGCCTGGAGGGCCTG | TGCTTGCAATGCTTG |   |
| BstEII | 462235 | 462243 | GGTTACCCT       | AGTAACTCT       |   |
| Sfil   | 468407 | 468421 | AAGGCCGACGTGGCC | AAAGCTGATGTTGCA |   |
| Sfil   | 476109 | 476123 | AAGGCCAAGATGGCC | AAGGCCAAGATGGCT |   |
| BsoBI  | 482651 | 482659 | ACTCGGGAG       | ACTTGGTAG       |   |
| Sfil   | 490281 | 490295 | GGCCAGTGCGGCCGC | AGCTAAGGCAGCGGC |   |
| RsrII  | 496863 | 496871 | CGGACCGCG       | TGGACCACG       |   |
| Sfil   | 504496 | 504510 | ACGGCCGCGCAGGCC | ACGGCTGCTCAAGCA |   |
| BanI   | 512733 | 512738 | GGTGCC          | GGGGCA          |   |
| Sfil   | 519139 | 519153 | GGCCGCGAAGGCCTG | GGTAGAGAAGGTTTA |   |
| Sfil   | 528574 | 528588 | GTGGCCTCCACGGCC | GTTGCATCAACTGCA |   |
| Bsu36I | 537267 | 537275 | CCTAAGGGT       | TCTTAAAGT       |   |

|        |        |        |                  |                 |   |
|--------|--------|--------|------------------|-----------------|---|
| Sfil   | 545299 | 545313 | GGCCGGTGC GGCCGA | AGCAGGAGCAGCAGA |   |
| BsoBI  | 552118 | 552126 | GCCTCGGGT        | GCTTCAGGT       |   |
| BanI   | 560303 | 560311 | TGGCACCGA        | TGGAACACT       |   |
| BglI   | 567516 | 567527 | AGCCTCTATGGC     | AGCCTGTATGGA    |   |
| BsiEI  | 577348 | 577356 | ACCGGTCGT        | ACTGGGCGT       |   |
| Sfil   | 583510 | 583524 | GAGGCCCCAGAGGCC  | GAAGCACCAGAAGCA |   |
| Sfil   | 593279 | 593293 | TCGGCCACGGTGGCC  | TCTGCAACAGTTGCA |   |
| BstEII | 602624 | 602632 | GGTCACCTG        | GGTCATTA        |   |
| BsoBI  | 612530 | 612538 | TCTCGGGAC        | CCGTGGTAC       |   |
| PflMI  | 621754 | 621768 | GACCAGCGCATGGAT  | GACTAAAGCATGAAT |   |
| Sfil   | 630080 | 630094 | GGCCGATGAGGCCGA  | AGCTGAACTAGCGCT |   |
| Sfil   | 638943 | 638957 | CTGGCCGCGTTGGCC  | CTTGCCGCACTGGCT |   |
| BanI   | 648302 | 648307 | GGTGCC           | GGTACC          |   |
| BsoBI  | 656648 | 656656 | ACTCGGGAA        | ACTCGAGAA       |   |
| BglI   | 665939 | 665950 | AGCCTGTCTGGGC    | TCCTTGAGTGGT    |   |
| BsoBI  | 673543 | 673548 | CCCGAG           | CCCGAG          | P |
| Sfil   | 680986 | 681000 | GGCCACCACGGCCAC  | AGCAACTACTGCGAC |   |
| Sfil   | 688593 | 688607 | TTGGCCGAGGAGGCC  | TTGGCTGAAGAAGCC |   |
| BanI   | 695076 | 695081 | GGTGCC           | GGCGCT          |   |
| Sfil   | 702559 | 702573 | GGCCAAGATGGCCCA  | GGCCAGGATGGTCCA |   |

**Table S6. Replication origins in *synX*.**

| Name    | Coordinates on WT Chromosome | Modifications             |
|---------|------------------------------|---------------------------|
| ARS1001 | 65-577                       | Deleted                   |
| ARS1002 | 7445-7943                    | Deleted                   |
| ARS1003 | 16124-16762                  |                           |
| ARS1004 | 23662-24158                  | Insertion of loxPsym site |
| ARS1005 | 67469-67950                  |                           |
| ARS1006 | 99367-99803                  |                           |
| ARS1007 | 113233-113834                |                           |
| ARS1008 | 204029-204917                |                           |
| ARS1009 | 228552-229043                |                           |
| ARS1010 | 298776-299256                |                           |
| ARS1011 | 337281-337529                |                           |
| ARS1012 | 374880-375122                |                           |
| ARS1013 | 375706-376227                |                           |
| ARS1014 | 417195-417440                |                           |
| ARS1015 | 442556-442965                |                           |
| ARS1016 | 454584-455555                |                           |
| ARS1017 | 459337-459895                |                           |
| ARS1018 | 540546-540780                |                           |
| ARS1019 | 612846-613278                |                           |
| ARS1020 | 654375-654614                |                           |
| ARS1021 | 683634-684122                |                           |
| ARS1022 | 711896-712142                |                           |
| ARS1023 | 729983-730513                |                           |
| ARS1024 | 737034-737275                | Insertion of loxPsym site |
| ARS1025 | 744408-745008                | Deleted                   |
